# Supplementary material
Source: ML conference proceedings conference paper supplement (https://proceedings.mlr.press/v163/borji22a.html)
Supplement: Supplementary file [file borji22a-supp.pdf]

## A Supplementary results

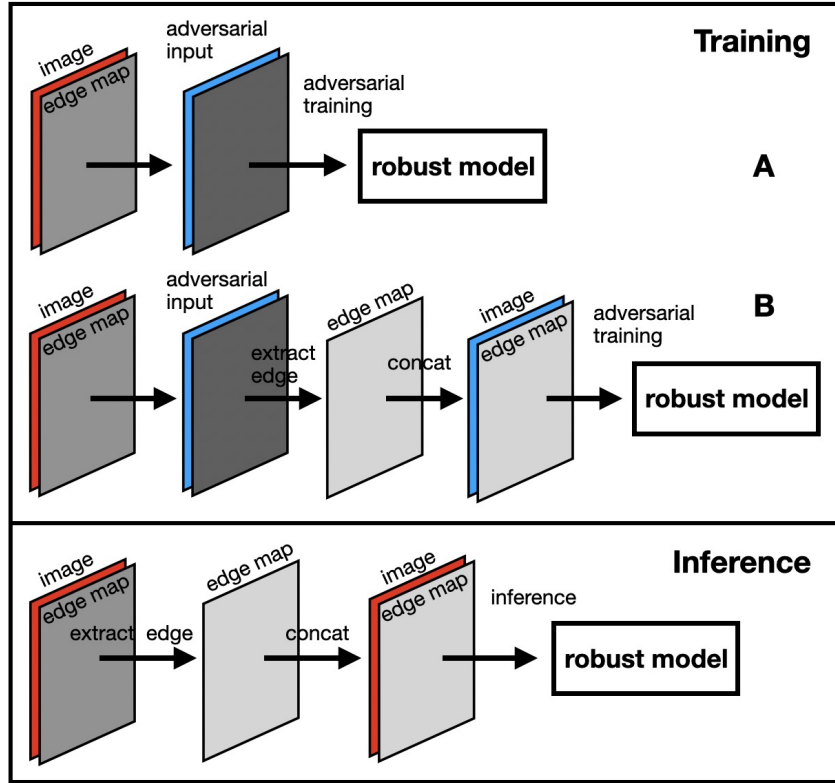

Figure 5: Edge-guided adversarial training (EAT). In its simplest form, adversarial training is performed over the 2D (Gray+Edge) or 4D (RGB+Edge) input (i.e., number of channels; denoted as Img+Edge). In a slightly more complicated form (B), first for each input (clean or adversarial), the old edge map is replaced with the newly extracted one. The edge map can be computed from the average of only image channels or all available channels (i.e., image plus edge).

Table 1: Results (Top-1 acc) over MNIST. The best accuracy in each column is highlighted in **bold**. In *italics* are the results of the substitute attack. Epsilon values are over 255. We used the  $\ell_\infty$  variants of FGSM and PGD. Img2Edge means applying the Edge model (first row) to the edge map of the image.

|        |                              | Orig. model  |              |              |              | Rob. model (8)         |                        | Rob. model (32)        |                        | Rob. model (64)               |                        | Average Rob. models |
|--------|------------------------------|--------------|--------------|--------------|--------------|------------------------|------------------------|------------------------|------------------------|-------------------------------|------------------------|---------------------|
|        |                              | 0/clean      | 8            | 32           | 64           | 0/clean                | 8                      | 0/clean                | 32                     | 0/clean                       | 64                     |                     |
| FGSM   | Edge                         | 0.964        | 0.925        | 0.586        | 0.059        | 0.973                  | 0.954                  | 0.970                  | 0.892                  | 0.964                         | 0.776                  | 0.921               |
|        | Img2Edge                     | ..           | <b>0.960</b> | <b>0.951</b> | <b>0.918</b> | ..                     | <b>0.971</b>           | ..                     | <b>0.957</b>           | ..                            | 0.910                  | <b>0.957</b>        |
|        | Img                          | <b>0.973</b> | 0.947        | 0.717        | 0.162        | <b>0.976</b>           | 0.955                  | <b>0.977</b>           | 0.892                  | 0.970                         | 0.745                  | 0.919               |
|        | Img+Edge                     | 0.972        | 0.941        | 0.664        | 0.089        | <b>0.976</b>           | 0.958                  | <b>0.977</b>           | 0.902                  | <b>0.972</b>                  | 0.782                  | 0.928               |
|        | Redetect                     | ..           | 0.950        | 0.803        | 0.356        | ..                     | 0.962 ( <i>0.968</i> ) | ..                     | 0.919 ( <i>0.947</i> ) | ..                            | 0.843 ( <i>0.881</i> ) | 0.941               |
|        | <b>Img + Redetected Edge</b> |              |              |              |              | 0.974                  | 0.950                  | 0.970                  | 0.771                  | 0.968                         | 0.228                  | 0.810               |
|        | Redetect                     |              |              |              | ..           | 0.958 ( <i>0.966</i> ) | ..                     | 0.929 ( <i>0.947</i> ) | ..                     | <b>0.922</b> ( <i>0.925</i> ) | 0.953                  |                     |
| PGD-40 | Edge                         | 0.964        | 0.923        | 0.345        | 0.000        | 0.971                  | 0.949                  | 0.973                  | 0.887                  | 0.955                         | 0.739                  | 0.912               |
|        | Img2Edge                     | ..           | <b>0.961</b> | <b>0.955</b> | <b>0.934</b> | ..                     | <b>0.970</b>           | ..                     | <b>0.958</b>           | ..                            | 0.927                  | <b>0.960</b>        |
|        | Img                          | <b>0.973</b> | 0.944        | 0.537        | 0.008        | 0.977                  | 0.957                  | <b>0.978</b>           | 0.873                  | 0.963                         | 0.658                  | 0.901               |
|        | Img+Edge                     | 0.972        | 0.938        | 0.446        | 0.001        | <b>0.978</b>           | 0.953                  | 0.975                  | 0.879                  | 0.965                         | 0.743                  | 0.915               |
|        | Redetect                     | ..           | 0.950        | 0.741        | 0.116        | ..                     | 0.960 ( <i>0.967</i> ) | ..                     | 0.913 ( <i>0.948</i> ) | ..                            | 0.804 ( <i>0.908</i> ) | 0.932               |
|        | <b>Img + Redetected Edge</b> |              |              |              |              | 0.975                  | 0.949                  | 0.973                  | 0.649                  | <b>0.968</b>                  | 0.000                  | 0.752               |
|        | Redetect                     |              |              |              | ..           | 0.958 ( <i>0.967</i> ) | ..                     | 0.945 ( <i>0.958</i> ) | ..                     | <b>0.939</b> ( <i>0.942</i> ) | <b>0.960</b>           |                     |

Table 2: Results over the CIFAR-10 dataset.

| $\epsilon$ |                                | Orig. model  |              |              | Rob. model (8) |                      | Rob. model (32) |                      | Average Rob. models |
|------------|--------------------------------|--------------|--------------|--------------|----------------|----------------------|-----------------|----------------------|---------------------|
|            |                                | 0/clean      | 8            | 32           | 0/clean        | 8                    | 0/clean         | 32                   |                     |
| FGSM       | Edge                           | 0.490        | 0.060        | 0.015        | 0.535          | 0.323                | 0.382           | 0.199                | 0.360               |
|            | Img2Edge                       | ..           | 0.258        | 0.258        | ..             | 0.270                | ..              | 0.217                | 0.351               |
|            | Img                            | <b>0.887</b> | 0.359        | 0.246        | <b>0.869</b>   | 0.668                | <b>0.855</b>    | 0.553                | 0.736               |
|            | Img + Edge                     | 0.860        | 0.366        | 0.169        | 0.846          | 0.611                | 0.815           | 0.442                | 0.679               |
|            | Redetect                       | ..           | <b>0.399</b> | <b>0.281</b> | ..             | 0.569 (0.631)        | ..              | 0.417 (0.546)        | 0.662               |
|            | Img + Redetected Edge Redetect |              |              |              |                | 0.846                | 0.530           | 0.832                | 0.337               |
|            |                                |              |              |              | ..             | <b>0.702</b> (0.753) | ..              | <b>0.569</b> (0.678) | <b>0.737</b>        |
| PGD-40     | Edge                           | 0.490        | 0.071        | 0.000        | 0.537          | 0.315                | 0.142           | 0.119                | 0.278               |
|            | Img2Edge                       | ..           | 0.259        | <b>0.253</b> | ..             | 0.274                | ..              | 0.253                | 0.301               |
|            | Img                            | <b>0.887</b> | 0.018        | 0.000        | 0.807          | 0.450                | 0.316           | 0.056                | 0.407               |
|            | Img + Edge                     | 0.860        | 0.019        | 0.000        | 0.788          | 0.429                | 0.176           | 0.119                | 0.378               |
|            | Redetect                       | ..           | <b>0.306</b> | 0.093        | ..             | 0.504 (0.646)        | ..              | 0.150 (0.170)        | 0.404               |
|            | Img + Redetected Edge Redetect |              |              |              |                | <b>0.834</b>         | 0.155           | <b>0.776</b>         | 0.006               |
|            |                                |              |              |              | ..             | <b>0.661</b> (0.767) | ..              | <b>0.392</b> (0.700) | <b>0.666</b>        |

Table 3: Results over the Fashion MNIST dataset (\*)

| $\epsilon$                     |              | Orig. model  |              |              |              | Rob. model (8) |               | Rob. model (32) |                      | Rob. model (64) |                      | Average Rob. models |
|--------------------------------|--------------|--------------|--------------|--------------|--------------|----------------|---------------|-----------------|----------------------|-----------------|----------------------|---------------------|
|                                |              | 0/clean      | 8            | 32           | 64           | 0/clean        | 8             | 0/clean         | 32                   | 0/clean         | 64                   |                     |
| FGSM                           |              |              |              |              |              |                |               |                 |                      |                 |                      |                     |
| Edge                           | 0.775        | 0.714        | 0.497        | 0.089        | 0.776        | 0.740          | 0.766         | <b>0.664</b>    | 0.748                | <b>0.750</b>    | <b>0.741</b>         |                     |
| Img2Edge                       | ..           | <b>0.755</b> | <b>0.679</b> | <b>0.452</b> | ..           | <b>0.762</b>   | ..            | <b>0.664</b>    | ..                   | 0.420           | 0.690                |                     |
| Img                            | 0.798        | 0.670        | 0.288        | 0.027        | <b>0.798</b> | 0.722          | 0.764         | 0.584           | <b>0.768</b>         | 0.505           | 0.690                |                     |
| Img+Edge                       | <b>0.809</b> | 0.662        | 0.229        | 0.010        | 0.794        | 0.732          | 0.769         | 0.623           | 0.750                | 0.537           | 0.701                |                     |
| Redetect                       | ..           | 0.691        | 0.326        | 0.053        | ..           | 0.739 (0.761)  | ..            | 0.616 (0.660)   | ..                   | 0.491 (0.496)   | 0.693                |                     |
| Img + Redetected Edge Redetect |              |              |              |              |              | 0.789          | 0.719         | <b>0.775</b>    | 0.539                | 0.762           | 0.045                | 0.605               |
|                                |              |              |              |              |              | ..             | 0.739 (0.753) | ..              | <b>0.664</b> (0.678) | ..              | 0.611 (0.532)        | 0.721               |
| PGD-40                         |              |              |              |              |              |                |               |                 |                      |                 |                      |                     |
| Edge                           | 0.775        | 0.711        | 0.370        | 0.002        | 0.783        | 0.744          | 0.769         | 0.661           | 0.743                | 0.574           | 0.712                |                     |
| Img2Edge                       | ..           | <b>0.757</b> | <b>0.683</b> | <b>0.380</b> | ..           | <b>0.762</b>   | ..            | 0.658           | ..                   | 0.374           | 0.681                |                     |
| Img                            | 0.798        | 0.659        | 0.133        | 0.000        | 0.792        | 0.713          | 0.760         | 0.515           | 0.734                | 0.324           | 0.640                |                     |
| Img+Edge                       | <b>0.809</b> | 0.647        | 0.100        | 0.000        | 0.794        | 0.726          | 0.765         | 0.608           | 0.744                | 0.568           | 0.701                |                     |
| Redetect                       | ..           | 0.682        | 0.235        | 0.014        | ..           | 0.734 (0.760)  | ..            | 0.629 (0.666)   | -                    | 0.607 (0.426)   | 0.712                |                     |
| Img + Redetected Edge Redetect |              |              |              |              |              | <b>0.800</b>   | 0.717         | <b>0.779</b>    | 0.393                | <b>0.771</b>    | 0.002                | 0.577               |
|                                |              |              |              |              |              | ..             | 0.743 (0.766) | ..              | <b>0.694</b> (0.681) | ..              | <b>0.690</b> (0.504) | <b>0.746</b>        |

Table 4: Results over the TinyImageNet dataset (\*)

| $\epsilon$                     |              | Orig. model  |              |              | Rob. model (8) |                      | Rob. model (32) |                      | Average Rob. models |
|--------------------------------|--------------|--------------|--------------|--------------|----------------|----------------------|-----------------|----------------------|---------------------|
|                                |              | 0/clean      | 8            | 32           | 0/clean        | 8                    | 0/clean         | 32                   |                     |
| FGSM                           |              |              |              |              |                |                      |                 |                      |                     |
| Edge                           | 0.136        | 0.010        | 0.001        | 0.150        | 0.078          | 0.098                | 0.021           | 0.087                |                     |
| Img2Edge                       | ..           | 0.097        | <b>0.096</b> | ..           | 0.094          | ..                   | 0.077           | 0.105                |                     |
| Img                            | <b>0.531</b> | 0.166        | 0.074        | <b>0.512</b> | 0.297          | <b>0.488</b>         | 0.168           | <b>0.366</b>         |                     |
| Img + Edge                     | 0.522        | 0.152        | 0.050        | 0.508        | 0.273          | 0.471                | 0.148           | 0.350                |                     |
| Redetect                       | ..           | <b>0.171</b> | 0.081        | ..           | 0.287 (0.356)  | ..                   | 0.162 (0.266)   | 0.357                |                     |
| Img + Redetected Edge Redetect |              |              |              |              | 0.505          | 0.264                | 0.482           | 0.111                | 0.340               |
|                                |              |              |              |              | ..             | <b>0.305</b> (0.371) | ..              | <b>0.171</b> (0.296) | <b>0.366</b>        |
| PGD-40                         |              |              |              |              |                |                      |                 |                      |                     |
| Edge                           | 0.136        | 0.007        | 0.000        | 0.148        | 0.077          | 0.039                | 0.014           | 0.069                |                     |
| Img2Edge                       | ..           | <b>0.094</b> | <b>0.092</b> | ..           | 0.095          | ..                   | 0.033           | 0.079                |                     |
| Img                            | <b>0.531</b> | 0.019        | 0.000        | 0.392        | 0.150          | 0.191                | 0.019           | 0.188                |                     |
| Img + Edge                     | 0.522        | 0.008        | 0.000        | 0.402        | 0.131          | 0.157                | 0.003           | 0.173                |                     |
| Redetect                       | ..           | 0.074        | 0.009        | ..           | 0.198 (0.353)  | ..                   | 0.019 (0.103)   | 0.194                |                     |
| Img + Redetected Edge Redetect |              |              |              |              | <b>0.425</b>   | 0.072                | <b>0.328</b>    | 0.005                | 0.208               |
|                                |              |              |              |              | ..             | <b>0.206</b> (0.380) | ..              | <b>0.073</b> (0.279) | <b>0.258</b>        |

Table 5: Results on CIFAR-10 dataset [edge map computed from 4 channels]

| $\epsilon$                   | Orig. model |       |       | Rob. model (8) |       | Rob. model (32) |       | Average<br>Rob. models |
|------------------------------|-------------|-------|-------|----------------|-------|-----------------|-------|------------------------|
|                              | 0/clean     | 8     | 32    | 0/clean        | 8     | 0/clean         | 32    |                        |
| <b>FGSM</b>                  |             |       |       |                |       |                 |       |                        |
| <b>Img+Edge</b>              | 0.860       | 0.366 | 0.169 | 0.846          | 0.611 | 0.815           | 0.442 | 0.679                  |
| Redetect                     | "           | 0.415 | 0.280 | "              | 0.574 | "               | 0.416 | 0.663                  |
| <b>Img + Redetected Edge</b> |             |       |       | 0.848          | 0.547 | 0.835           | 0.351 | 0.645                  |
| Redetect                     |             |       |       | "              | 0.696 | "               | 0.553 | 0.733                  |
| <b>PGD-40</b>                |             |       |       |                |       |                 |       |                        |
| <b>Img+Edge</b>              | 0.860       | 0.000 | 0.000 | 0.789          | 0.431 | 0.179           | 0.135 | 0.384                  |
| Redetect                     | "           | 0.087 | 0.087 | "              | 0.501 | "               | 0.152 | 0.405                  |
| <b>Img + Redetected Edge</b> |             |       |       | 0.837          | 0.164 | 0.767           | 0.010 | 0.444                  |
| Redetect                     |             |       |       | "              | 0.648 | "               | 0.352 | 0.651                  |

Table 6: Results on DogVsCat dataset [edge map computed from 4 channels] (\*)

| $\epsilon$                   | Orig. model  |              |              | Rob. model (8) |              | Rob. model (32) |              | Average<br>Rob. models |
|------------------------------|--------------|--------------|--------------|----------------|--------------|-----------------|--------------|------------------------|
|                              | 0/clean      | 8            | 32           | 0/clean        | 8            | 0/clean         | 32           |                        |
| <b>FGSM</b>                  |              |              |              |                |              |                 |              |                        |
| <b>Edge</b>                  | 0.814        | 0.633        | 0.119        | 0.812          | 0.757        | 0.806           | <b>0.999</b> | 0.843                  |
| <b>Img2Edge</b>              | "            | <b>0.755</b> | <b>0.584</b> | "              | <b>0.767</b> | "               | 0.576        | 0.740                  |
| <b>Img</b>                   | <b>0.863</b> | 0.007        | 0.051        | 0.777          | 0.430        | <b>0.819</b>    | 0.985        | 0.753                  |
| <b>Img+Edge</b>              | 0.823        | 0.007        | 0.000        | 0.782          | 0.641        | 0.808           | 0.992        | 0.806                  |
| Redetect                     | "            | 0.043        | 0.002        | "              | 0.666        | "               | 0.986        | 0.810                  |
| <b>Img + Redetected Edge</b> |              |              |              | <b>0.829</b>   | 0.615        | 0.812           | 0.853        | 0.778                  |
| Redetect                     |              |              |              | "              | 0.763        | "               | 0.998        | <b>0.850</b>           |
| <b>PGD-40</b>                |              |              |              |                |              |                 |              |                        |
| <b>Edge</b>                  | 0.814        | 0.624        | 0.018        | <b>0.820</b>   | 0.770        | 0.763           | 0.681        | 0.758                  |
| <b>Img2Edge</b>              | "            | <b>0.760</b> | <b>0.568</b> | "              | <b>0.778</b> | "               | 0.656        | 0.754                  |
| <b>Img</b>                   | <b>0.863</b> | 0.000        | 0.000        | 0.769          | 0.384        | 0.500           | 0.500        | 0.538                  |
| <b>Img+Edge</b>              | 0.823        | 0.000        | 0.000        | 0.785          | 0.689        | 0.816           | 0.496        | 0.696                  |
| Redetect                     | "            | 0.006        | 0.000        | "              | 0.744        | "               | 0.500        | 0.711                  |
| <b>Img + Redetected Edge</b> |              |              |              | 0.819          | 0.600        | <b>0.817</b>    | 0.009        | 0.561                  |
| Redetect                     |              |              |              | "              | 0.760        | "               | <b>0.972</b> | <b>0.842</b>           |

Table 7: Results on DogBreeds dataset using Sobel edge detection [edge map computed from 4 channels] (\*)

| $\epsilon$                   | Orig. model  |              |              | Rob. model (8) |              | Rob. model (32) |              | Average<br>Rob. models |
|------------------------------|--------------|--------------|--------------|----------------|--------------|-----------------|--------------|------------------------|
|                              | 0/clean      | 8            | 32           | 0/clean        | 8            | 0/clean         | 32           |                        |
| <b>FGSM</b>                  |              |              |              |                |              |                 |              |                        |
| <b>Edge</b>                  | 0.750        | 0.006        | 0.031        | 0.506          | 0.101        | 0.413           | 0.073        | 0.273                  |
| <b>Img2Edge</b>              | "            | 0.236        | <b>0.194</b> | "              | 0.362        | "               | 0.241        | 0.380                  |
| <b>Img</b>                   | <b>0.899</b> | 0.256        | 0.140        | 0.823          | 0.595        | 0.829           | <b>0.449</b> | 0.674                  |
| <b>Img + Edge</b>            | 0.896        | 0.225        | 0.098        | <b>0.862</b>   | 0.534        | 0.820           | 0.385        | 0.650                  |
| Redetect                     | "            | <b>0.244</b> | 0.171        | "              | 0.455        | "               | 0.292        | 0.607                  |
| <b>Img + Redetected Edge</b> |              |              |              | 0.843          | 0.506        | <b>0.874</b>    | 0.298        | 0.630                  |
| Redetect                     |              |              |              | "              | <b>0.618</b> | "               | 0.419        | <b>0.689</b>           |
| <b>PGD-40</b>                |              |              |              |                |              |                 |              |                        |
| <b>Edge</b>                  | 0.750        | 0.000        | 0.000        | 0.514          | 0.065        | 0.036           | 0.000        | 0.154                  |
| <b>Img2Edge</b>              | "            | <b>0.250</b> | <b>0.207</b> | "              | 0.301        | "               | 0.037        | 0.222                  |
| <b>Img</b>                   | <b>0.899</b> | 0.000        | 0.000        | 0.795          | 0.286        | 0.596           | 0.025        | 0.425                  |
| <b>Img + Edge</b>            | 0.896        | 0.000        | 0.000        | 0.789          | 0.225        | 0.567           | 0.042        | 0.406                  |
| Redetect                     | "            | 0.008        | 0.000        | "              | 0.396        | "               | 0.065        | 0.454                  |
| <b>Img + Redetected Edge</b> |              |              |              | <b>0.772</b>   | 0.028        | <b>0.677</b>    | 0.000        | 0.369                  |
| Redetect                     |              |              |              | "              | <b>0.393</b> | "               | <b>0.149</b> | <b>0.498</b>           |

Table 8: Results on GTSRB dataset [edge map computed from 4 channels] (\*)

| $\epsilon$                   | Orig. model  |              |              | Rob. model (8) |              | Rob. model (32) |              | Average Rob. models |
|------------------------------|--------------|--------------|--------------|----------------|--------------|-----------------|--------------|---------------------|
|                              | 0/clean      | 8            | 32           | 0/clean        | 8            | 0/clean         | 32           |                     |
| <b>FGSM</b>                  |              |              |              |                |              |                 |              |                     |
| Edge                         | 0.938        | <b>0.683</b> | 0.315        | <b>0.947</b>   | <b>0.863</b> | <b>0.946</b>    | 0.701        | 0.864               |
| Img2Edge                     | ..           | 0.501        | 0.451        | ..             | 0.516        | ..              | 0.469        | 0.719               |
| Img                          | <b>0.955</b> | 0.464        | 0.322        | 0.902          | 0.607        | 0.896           | 0.562        | 0.742               |
| Img + Edge                   | 0.951        | 0.624        | 0.382        | 0.940          | 0.842        | 0.943           | 0.686        | 0.853               |
| Redetect                     | ..           | 0.592        | <b>0.471</b> | ..             | 0.743        | ..              | 0.626        | 0.813               |
| <b>Img + Redetected Edge</b> |              |              |              | 0.925          | 0.801        | 0.939           | 0.616        | 0.820               |
| Redetect                     |              |              |              | ..             | 0.844        | ..              | <b>0.766</b> | <b>0.869</b>        |
| <b>PGD-40</b>                |              |              |              |                |              |                 |              |                     |
| Edge                         | 0.938        | <b>0.618</b> | 0.054        | <b>0.950</b>   | <b>0.861</b> | <b>0.937</b>    | <b>0.598</b> | <b>0.836</b>        |
| Img2Edge                     | ..           | 0.501        | <b>0.459</b> | ..             | 0.506        | ..              | 0.462        | 0.714               |
| Img                          | <b>0.955</b> | 0.189        | 0.033        | 0.855          | 0.495        | 0.736           | 0.246        | 0.583               |
| Img + Edge                   | 0.951        | 0.271        | 0.021        | 0.943          | 0.750        | 0.839           | 0.342        | 0.718               |
| Redetect                     | ..           | 0.526        | 0.251        | ..             | 0.774        | ..              | 0.514        | 0.767               |
| <b>Img + Redetected Edge</b> |              |              |              | 0.929          | 0.505        | 0.893           | 0.134        | 0.615               |
| Redetect                     |              |              |              | ..             | 0.818        | ..              | 0.557        | 0.799               |

Table 9: Results on GTSRB dataset [edge map computed from 3 channels]

| $\epsilon$                   | Orig. model |       |       | Rob. model (8) |       | Rob. model (32) |       | Average Rob. models |
|------------------------------|-------------|-------|-------|----------------|-------|-----------------|-------|---------------------|
|                              | 0/clean     | 8     | 32    | 0/clean        | 8     | 0/clean         | 32    |                     |
| <b>FGSM</b>                  |             |       |       |                |       |                 |       |                     |
| Img + Edge                   | 0.951       | 0.624 | 0.382 | 0.940          | 0.842 | 0.943           | 0.686 | 0.853               |
| Redetect                     | ..          | 0.500 | 0.395 | ..             | 0.558 | ..              | 0.492 | 0.733               |
| <b>Img + Redetected Edge</b> |             |       |       | 0.889          | 0.699 | 0.891           | 0.549 | 0.757               |
| Redetect                     |             |       |       | ..             | 0.610 | ..              | 0.577 | 0.742               |

Table 10: Results on Icons-50 dataset [edge map computed from 4 channels] (\*)

| $\epsilon$                   | Orig. model  |              |              | Rob. model (8) |              | Rob. model (32) |              | Average Rob. models |
|------------------------------|--------------|--------------|--------------|----------------|--------------|-----------------|--------------|---------------------|
|                              | 0/clean      | 8            | 32           | 0/clean        | 8            | 0/clean         | 32           |                     |
| <b>FGSM</b>                  |              |              |              |                |              |                 |              |                     |
| Edge                         | 0.883        | 0.545        | 0.210        | <b>0.904</b>   | 0.771        | <b>0.889</b>    | 0.594        | 0.789               |
| Img2Edge                     | ..           | <b>0.713</b> | <b>0.690</b> | ..             | 0.746        | ..              | 0.730        | <b>0.817</b>        |
| Img                          | <b>0.930</b> | 0.495        | 0.433        | 0.772          | 0.789        | 0.836           | 0.720        | 0.779               |
| Img + Edge                   | 0.929        | 0.569        | 0.433        | 0.829          | 0.818        | 0.844           | <b>0.745</b> | 0.809               |
| Redetect                     | ..           | 0.470        | 0.414        | ..             | 0.730        | ..              | 0.732        | 0.784               |
| <b>Img + Redetected Edge</b> |              |              |              | 0.841          | <b>0.837</b> | 0.849           | 0.688        | 0.804               |
| Redetect                     |              |              |              | ..             | 0.817        | ..              | 0.710        | 0.804               |
| <b>PGD-40</b>                |              |              |              |                |              |                 |              |                     |
| Edge                         | 0.883        | 0.423        | 0.000        | <b>0.902</b>   | 0.769        | <b>0.846</b>    | 0.404        | 0.730               |
| Img2Edge                     | ..           | <b>0.706</b> | <b>0.683</b> | ..             | 0.753        | ..              | <b>0.695</b> | <b>0.799</b>        |
| Img                          | <b>0.930</b> | 0.341        | 0.113        | 0.765          | 0.663        | 0.736           | 0.453        | 0.654               |
| Img + Edge                   | 0.929        | 0.320        | 0.011        | 0.800          | 0.678        | 0.785           | 0.366        | 0.657               |
| Redetect                     | ..           | 0.416        | 0.248        | ..             | 0.738        | ..              | 0.660        | 0.746               |
| <b>Img + Redetected Edge</b> |              |              |              | 0.838          | 0.644        | 0.824           | 0.097        | 0.601               |
| Redetect                     |              |              |              | ..             | <b>0.792</b> | ..              | 0.539        | 0.748               |

Table 11: Results on Icons-50 dataset [edge map computed from 3 channels]

| $\epsilon$                   | Orig. model |       |       | Rob. model (8) |       | Rob. model (32) |       | Average Rob. models |
|------------------------------|-------------|-------|-------|----------------|-------|-----------------|-------|---------------------|
|                              | 0/clean     | 8     | 32    | 0/clean        | 8     | 0/clean         | 32    |                     |
| <b>FGSM</b>                  |             |       |       |                |       |                 |       |                     |
| Img+Edge                     | 0.929       | 0.569 | 0.433 | 0.829          | 0.818 | 0.844           | 0.745 | 0.809               |
| Redetect                     | ..          | 0.520 | 0.460 | ..             | 0.737 | ..              | 0.731 | 0.785               |
| <b>Img + Redetected Edge</b> |             |       |       | 0.831          | 0.788 | 0.870           | 0.725 | 0.804               |
| Redetect                     |             |       |       | ..             | 0.783 | ..              | 0.765 | 0.812               |

Table 12: Results on Sketch dataset [edge map computed from 2 channels] (\*)

| €                            | Orig. model  |              |              | Rob. model (8) |              | Rob. model (32) |              | Average Rob. models |
|------------------------------|--------------|--------------|--------------|----------------|--------------|-----------------|--------------|---------------------|
|                              | 0/clean      | 8            | 32           | 0/clean        | 8            | 0/clean         | 32           |                     |
| <b>FGSM</b>                  |              |              |              |                |              |                 |              |                     |
| Edge                         | 0.479        | 0.167        | <b>0.041</b> | 0.502          | 0.343        | <b>0.483</b>    | <b>0.216</b> | <b>0.386</b>        |
| Img2Edge                     | ..           | <b>0.464</b> | 0.014        | ..             | <b>0.494</b> | ..              | 0.022        | 0.375               |
| Img                          | <b>0.532</b> | 0.109        | 0.021        | <b>0.530</b>   | 0.278        | 0.474           | 0.144        | 0.356               |
| Gray + Edge                  | 0.486        | 0.097        | 0.019        | 0.513          | 0.286        | 0.440           | 0.167        | 0.352               |
| Redetect                     | ..           | 0.263        | 0.004        | ..             | 0.355        | ..              | 0.013        | 0.330               |
| <b>Img + Redetected Edge</b> |              |              |              | 0.497          | 0.180        | 0.420           | 0.071        | 0.292               |
| Redetect                     |              |              |              | ..             | 0.416        | ..              | 0.162        | 0.374               |
| <b>PGD-40</b>                |              |              |              |                |              |                 |              |                     |
| Edge                         | 0.480        | 0.106        | 0.000        | 0.508          | 0.341        | 0.401           | 0.068        | 0.330               |
| Img2Edge                     | ..           | <b>0.471</b> | <b>0.127</b> | ..             | <b>0.499</b> | ..              | <b>0.214</b> | <b>0.405</b>        |
| Img                          | <b>0.532</b> | 0.028        | 0.000        | <b>0.538</b>   | 0.260        | 0.018           | 0.000        | 0.204               |
| Gray + Edge                  | 0.486        | 0.034        | 0.000        | 0.500          | 0.279        | 0.026           | 0.000        | 0.201               |
| Redetect                     | ..           | 0.277        | 0.024        | ..             | 0.360        | ..              | 0.004        | 0.223               |
| <b>Img + Redetected Edge</b> |              |              |              | 0.502          | 0.121        | <b>0.448</b>    | 0.000        | 0.268               |
| Redetect                     |              |              |              | ..             | 0.423        | ..              | 0.212        | 0.396               |

Table 13: Results on Sketch dataset [edge map computed from 1 channel]

| €                            | Orig. model |       |       | Rob. model (8) |       | Rob. model (32) |       | Average Rob. models |
|------------------------------|-------------|-------|-------|----------------|-------|-----------------|-------|---------------------|
|                              | 0/clean     | 8     | 32    | 0/clean        | 8     | 0/clean         | 32    |                     |
| <b>FGSM</b>                  |             |       |       |                |       |                 |       |                     |
| Gray + Edge                  | 0.486       | 0.097 | 0.019 | 0.513          | 0.286 | 0.440           | 0.167 | 0.352               |
| Redetect                     | ..          | 0.213 | 0.005 | ..             | 0.388 | ..              | 0.022 | 0.341               |
| <b>Img + Redetected Edge</b> |             |       |       | 0.519          | 0.296 | 0.445           | 0.191 | 0.363               |
| Redetect                     |             |       |       | ..             | 0.397 | ..              | 0.020 | 0.345               |

Table 14: Results on Imagenette2-160 dataset [edge map computed from 4 channels] (\*)

| €                            | Orig. model  |              |              | Rob. model (8) |              | Rob. model (32) |              | Average Rob. models |
|------------------------------|--------------|--------------|--------------|----------------|--------------|-----------------|--------------|---------------------|
|                              | 0/clean      | 8            | 32           | 0/clean        | 8            | 0/clean         | 32           |                     |
| <b>FGSM</b>                  |              |              |              |                |              |                 |              |                     |
| Edge                         | 0.780        | 0.101        | 0.436        | 0.781          | 0.520        | 0.664           | 0.245        | 0.553               |
| Img2Edge                     | ..           | 0.599        | <b>0.598</b> | ..             | 0.603        | ..              | 0.578        | 0.656               |
| Img                          | <b>0.969</b> | 0.617        | 0.409        | <b>0.959</b>   | 0.827        | 0.946           | 0.710        | 0.860               |
| Img + Edge                   | 0.959        | 0.613        | 0.373        | 0.951          | 0.801        | 0.935           | 0.643        | 0.832               |
| Redetect                     | ..           | <b>0.652</b> | 0.471        | ..             | 0.812        | ..              | 0.687        | 0.846               |
| <b>Img + Redetected Edge</b> |              |              |              | 0.950          | 0.747        | <b>0.949</b>    | 0.592        | 0.810               |
| Redetect                     |              |              |              | ..             | <b>0.834</b> | ..              | <b>0.732</b> | <b>0.866</b>        |
| <b>PGD-40</b>                |              |              |              |                |              |                 |              |                     |
| Edge                         | 0.780        | 0.064        | 0.000        | 0.794          | 0.526        | 0.577           | 0.071        | 0.492               |
| Img2Edge                     | ..           | <b>0.601</b> | <b>0.577</b> | ..             | 0.610        | ..              | 0.381        | 0.591               |
| Img                          | <b>0.969</b> | 0.052        | 0.005        | 0.918          | 0.599        | 0.808           | 0.221        | 0.636               |
| Img + Edge                   | 0.959        | 0.045        | 0.000        | 0.909          | 0.558        | 0.762           | 0.151        | 0.595               |
| Redetect                     | ..           | 0.445        | 0.069        | ..             | 0.743        | ..              | 0.305        | 0.680               |
| <b>Img + Redetected Edge</b> |              |              |              | <b>0.944</b>   | 0.246        | <b>0.883</b>    | 0.046        | 0.530               |
| Redetect                     |              |              |              | ..             | <b>0.757</b> | ..              | <b>0.432</b> | <b>0.754</b>        |

## B Robustness against substitute model attacks

Following [13], we trained substitute models to mimic the robust models (with the same architecture but with RGB channels) using the cross-entropy loss over the logits of the two networks, for 5 epochs. The adversarial examples crafted for the substitute networks were then fed to the robust networks. Results are shown in *italics* in Tables 1, 2, 3 and 4 (performed only against the edge-redetect models). We find that this attack is not able to knock off the robust models. Surprisingly, it even improves the accuracy in some cases.

Table 15: Results of the substitute attack against the robust Img + Edge models (redetect and full model).

| $\epsilon$ | MNIST |    |    | Fashion MNIST |    |    | CIFAR |    | TinyImgNet |    |
|------------|-------|----|----|---------------|----|----|-------|----|------------|----|
|            | 8     | 32 | 64 | 8             | 32 | 64 | 8     | 32 | 8          | 32 |

### FGSM

#### Img + edge model (redetect inference)

|                                        |        |        |        |        |        |        |        |        |       |       |
|----------------------------------------|--------|--------|--------|--------|--------|--------|--------|--------|-------|-------|
| Substitute model on clean images       | 0.94   | 0.9365 | 0.9314 | 0.7515 | 0.7393 | 0.7311 | 0.8079 | 0.7766 | 0.008 | 0.008 |
| Substitute model on adversarial images | 0.8941 | 0.5858 | 0.0992 | 0.6484 | 0.3701 | 0.0967 | 0.2716 | 0.2049 | 0.004 | 0.003 |
| Robust model on clean images           | 0.9761 | 0.9766 | 0.9722 | 0.7939 | 0.7692 | 0.75   | 0.8463 | 0.8463 | 0.508 | 0.471 |
| Robust model on adversarial images     | 0.9623 | 0.9189 | 0.842  | 0.7391 | 0.6156 | 0.4908 | 0.5695 | 0.4186 | 0.287 | 0.161 |
| Robust model on substitute adv. images | 0.9678 | 0.9472 | 0.8813 | 0.7609 | 0.6604 | 0.4955 | 0.6307 | 0.5463 | 0.356 | 0.266 |

#### Img + redetected edge model (redetect inference)

|                                        |        |        |        |        |        |        |        |        |       |       |
|----------------------------------------|--------|--------|--------|--------|--------|--------|--------|--------|-------|-------|
| Substitute model on clean images       | 0.9381 | 0.9335 | 0.9326 | 0.7513 | 0.7431 | 0.7388 | 0.8104 | 0.7966 | 0.008 | 0.008 |
| Substitute model on adversarial images | 0.89   | 0.5696 | 0.0989 | 0.6538 | 0.3663 | 0.08   | 0.2879 | 0.1988 | 0.004 | 0.002 |
| Robust model on clean images           | 0.9742 | 0.9699 | 0.9681 | 0.7891 | 0.7746 | 0.7617 | 0.8456 | 0.8328 | 0.495 | 0.482 |
| Robust model on adversarial images     | 0.9583 | 0.9283 | 0.9216 | 0.7392 | 0.664  | 0.6115 | 0.7032 | 0.5684 | 0.380 | 0.170 |
| Robust model on substitute adv. images | 0.9657 | 0.9469 | 0.9249 | 0.7529 | 0.6776 | 0.5318 | 0.7528 | 0.7528 | 0.371 | 0.296 |

### PGD-40

#### Img + edge model (redetect inference)

|                                        |        |        |        |        |        |        |       |       |       |       |
|----------------------------------------|--------|--------|--------|--------|--------|--------|-------|-------|-------|-------|
| Substitute model on clean images       | 0.9391 | 0.9344 | 0.9257 | 0.7531 | 0.7408 | 0.7303 | 0.756 | 0.194 | 0.008 | 0.006 |
| Substitute model on adv. images        | 0.8906 | 0.4455 | 0.0196 | 0.6473 | 0.2745 | 0.0096 | 0.020 | 0.003 | 0.000 | 0.000 |
| Robust model on clean images           | 0.9782 | 0.9751 | 0.9654 | 0.7938 | 0.7652 | 0.7442 | 0.788 | 0.179 | 0.395 | 0.157 |
| Robust model on adv. images            | 0.9599 | 0.9132 | 0.8039 | 0.7336 | 0.6289 | 0.6068 | 0.504 | 0.152 | 0.242 | 0.018 |
| Robust model on substitute adv. images | 0.9667 | 0.9477 | 0.9079 | 0.7603 | 0.6656 | 0.4263 | 0.646 | 0.170 | 0.352 | 0.103 |

#### Img + redetected edge model (redetect inference)

|                                        |        |        |        |        |        |        |       |       |       |       |
|----------------------------------------|--------|--------|--------|--------|--------|--------|-------|-------|-------|-------|
| Substitute model on clean images       | 0.9385 | 0.9363 | 0.9329 | 0.7503 | 0.7471 | 0.7415 | 0.804 | 0.730 | 0.008 | 0.008 |
| Substitute model on adv. images        | 0.8888 | 0.4617 | 0.0211 | 0.6458 | 0.2687 | 0.01   | 0.016 | 0.000 | 0.000 | 0.000 |
| Robust model on clean images           | 0.975  | 0.9732 | 0.9682 | 0.7998 | 0.7793 | 0.7715 | 0.834 | 0.766 | 0.425 | 0.328 |
| Robust model on adv. images            | 0.9581 | 0.9449 | 0.9386 | 0.7435 | 0.6943 | 0.6902 | 0.662 | 0.375 | 0.206 | 0.074 |
| Robust model on substitute adv. images | 0.9665 | 0.9575 | 0.9417 | 0.7661 | 0.681  | 0.5037 | 0.767 | 0.700 | 0.380 | 0.279 |

## C Robustness against Carlini-Wagner (CW) and Boundary attacks

Performance of our method against  $l_2$  CW attack [3] on MNIST dataset is shown in Table 16. To make experiments tractable, we set the number of attack iterations to 10. With even 10 iterations, the original Edge and Img models are severely degraded. Img2Edge and Img+(Edge Redetect) models, however, remain robust. Adversarial training with CW attack results in robust models in all cases.

Performance of the the EAT defense against the  $l_2$  Carlini-Wagner attack [3] with the following parameters:

```
attack = CW(net, targeted=False, c=1e-4, kappa=0, iters=10, lr=0.001)
```

Table 16: Robustness against Carlini-Wagner (CW) and Boundary attacks

|                              | Orig. model |       | Robust model |       | Average Rob. models |
|------------------------------|-------------|-------|--------------|-------|---------------------|
|                              | 0/clean     | adv.  | 0/clean      | adv.  |                     |
| <b>Edge</b>                  | 0.964       | 0.106 | 0.948        | 0.798 | 0.873               |
| <b>Img2Edge</b>              | „           | 0.962 | „            | 0.949 | <b>0.949</b>        |
| <b>Img</b>                   | 0.973       | 0.103 | 0.949        | 0.856 | 0.903               |
| <b>Img+Edge</b>              | 0.972       | 0.097 | 0.945        | 0.845 | 0.895               |
| Redetect                     | „           | 0.971 | „            | 0.942 | 0.944               |
| <b>Img + Redetected Edge</b> |             |       | 0.947        | 0.819 | 0.883               |
| Redetect                     |             |       | „            | 0.946 | 0.946               |

## D Robustness against Boundary attack

Results against the decision-based Boundary attack [1] over MNIST and Fashion MNIST datasets are shown below. Edge, Img, and Img+Edge models perform close to zero over adversarial images. Img+(Edge Redetect) model remains robust since the Canny edge map does not change much after the attack, as is illustrated in Fig. 6.

Performance of the the edge augmented model against the Boundary attack [1] with the following parameters:

```
BoundaryAttack(init_attack=None, steps=25000, spherical_step=0.01,
               source_step=0.01, source_step_convergence=1e-07,
               step_adaptation=1.5, tensorboard=False,
               update_stats_every_k=10)
```

Table 17: Results over 500 images from the MNIST dataset

|                                                                                             | Orig. model |                 |
|---------------------------------------------------------------------------------------------|-------------|-----------------|
|                                                                                             | 0/clean     | adv. (boundary) |
| <b>Edge</b>                                                                                 | 0.964       | 0.000           |
| <b>Img</b>                                                                                  | 0.973       | 0.003           |
| <b>Img+Edge</b>                                                                             | 0.972       | 0.000           |
| Redetect                                                                                    | „           | <b>0.945</b>    |
| <b>Img+Redetected Edge (adversarially trained using FGSM <math>\epsilon = 8/255</math>)</b> | 0.974       | 0.001           |
| Redetect                                                                                    | „           | <b>0.965</b>    |

Table 18: Results over 500 images from the Fashion MNIST dataset

|                                                                                             | Orig. model |                 |
|---------------------------------------------------------------------------------------------|-------------|-----------------|
|                                                                                             | 0/clean     | adv. (boundary) |
| <b>Edge</b>                                                                                 | 0.776       | 0.005           |
| <b>Img</b>                                                                                  | 0.798       | 0.018           |
| <b>Img+Edge</b>                                                                             | 0.809       | 0.003           |
| Redetect                                                                                    | „           | <b>0.747</b>    |
| <b>Img+Redetected Edge (adversarially trained using FGSM <math>\epsilon = 8/255</math>)</b> | 0.789       | 0.003           |
| Redetect                                                                                    | „           | <b>0.770</b>    |

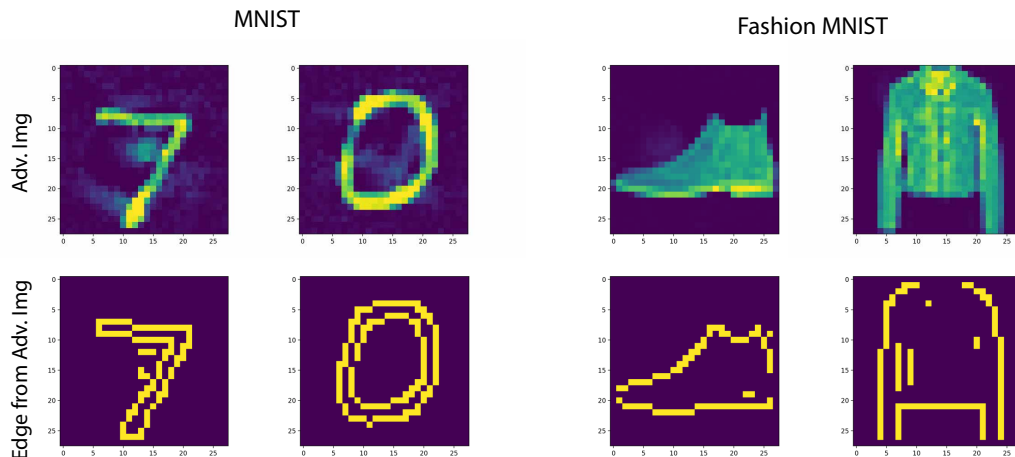

Figure 6: Sample images from the Boundary attack.



## E Robustness against adaptive attacks

### E.1 Robustness against adaptive attacks over Imagenette2-160 dataset

We use the PyTorch implementation<sup>3</sup> of the HED edge detector proposed by [15]. Here, a classifier is first trained on top of the edge maps from the HED. Then, the entire pipeline ( $\text{Img} \rightarrow \text{HED} \rightarrow \text{Classifier}^{\text{HED}}$ ) is attacked to generate an adversarial image. The performance of this classifier is measured on both clean and adversarial images. The adversarial image is also fed to the classifier trained on Canny edge maps (i.e.,  $\text{Img}^{\text{adv-HED}} \rightarrow \text{Canny} \rightarrow \text{Classifier}^{\text{Canny}}$ ). Results are shown in Table below. As it can be seen, adversarial examples crafted for HED fail to completely fool the model trained on Canny edges (i.e., they do not transfer).

Table 19: Results over 500 images from the Imagenette2-160 dataset against the FGSM and PGD-5 ( $\epsilon = 8/255$ ) attacks.

|                                                                                                                            | Orig. model |             |              |
|----------------------------------------------------------------------------------------------------------------------------|-------------|-------------|--------------|
|                                                                                                                            | 0/clean     | adv. (FGSM) | adv. (PGD-5) |
| <b>Img2Edge (Img <math>\rightarrow</math> HED <math>\rightarrow</math> Classifier<sup>HED</sup>)</b>                       | 0.793       | 0.052       | 0.003        |
| <b>Img2Edge (Img<sup>adv-HED</sup> <math>\rightarrow</math> Canny <math>\rightarrow</math> Classifier<sup>Canny</sup>)</b> | 0.767       | 0.542       | 0.548        |

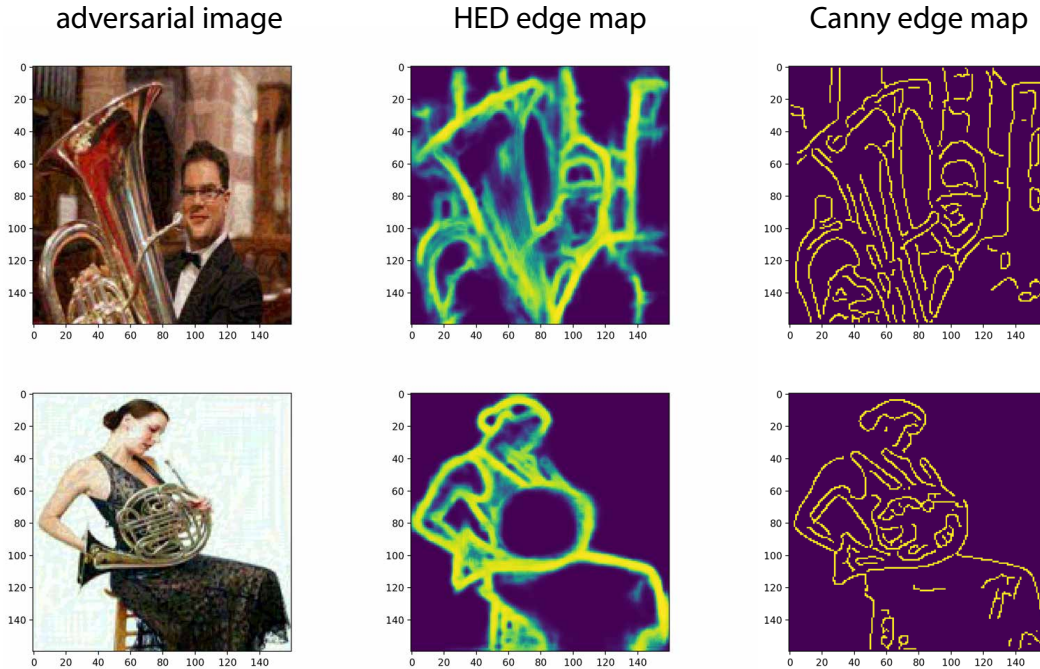

Figure 7: Two sample adversarial images (FGSM) along with their edge maps using HED and Canny edge detection methods.

### E.2 Robustness against adaptive attacks over MNIST dataset

Here, we attempt to explicitly approximate the Canny edge detector using a differentiable convolutional autoencoder. In our pipeline, a classifier (CNN) is stacked after the convolutional autoencoder (with sigmoid output neurons). We first freeze the classifier and train the autoencoder using the MSE loss with (input, output) pair being (image, canny edge map). We then freeze the autoencoder and train the classifier using Cross Entropy loss. After training the network, we then craft adversarial examples for it and feed them to a classifier trained on

<sup>3</sup><https://github.com/sniklaus/pytorch-hed>

Canny edges (original models or robust models as was mentioned in the main text). Fig. 8 shows the pipeline and some sample approximated edge maps. Fig. 9 shows the architecture details in PyTorch.

The top panel in Fig. 10 shows results using the FGSM and PGD-40 attacks against the pipeline itself, and also against the Img2Edge model (trained over clean edges or adversarial ones<sup>4</sup>). As can be seen, both attacks are very successful against the pipeline but they do not perform well against the Canny edge map classifier (i.e., crafted adversarial examples for the pipeline do not transfer well to the Img2Edge trained over Canny Edge map;  $\text{img} \rightarrow \text{Canny} \rightarrow \text{class label}$ ). Notice, that here we only used the model trained on edge maps. It is likely to gain even better robustness against the adaptive attacks in using the  $\text{img}+\text{edge}+\text{redetect}$ .

The bottom panel in Fig. 10 shows sample adversarial digits (constructed using the adaptive attack) and their edge maps under the FGSM and PGD-40 attacks. Notice how PGD-40 attack preserves the edges (compared to FGSM). This is because it needs less perturbation to fool the classifier. Also, notice that the perturbations shown are perceptible which results in edges maps having noise. If we limit ourselves to imperceptible perturbations, then edge maps will not change much compared to the original edge maps on clean images.

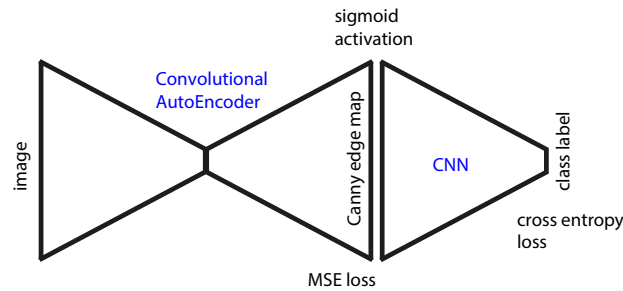

1. Freeze the CNN (`requires_grad = False`) and train the AutoEncoder
2. Freeze the AutoEncoder (`requires_grad = False`) and train the CNN
3. Unfreeze all the network (`requires_grad = True`) and attack it
4. Feed the adversarial image to a CNN trained with Canny edge maps

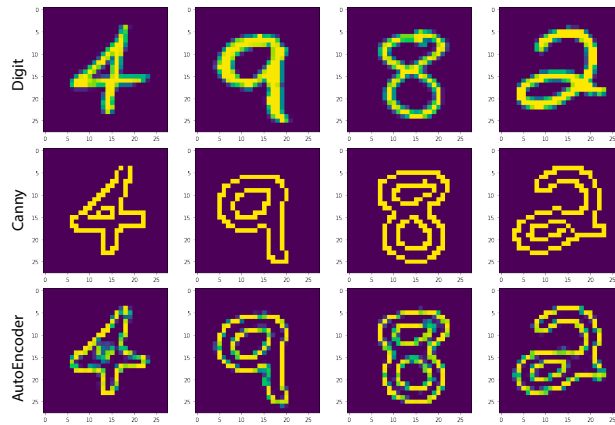

Figure 8: Top: our pipeline to approximate the Canny edge detector and our approach for crafting adversarial examples, Bottom: Sample digits and their generated edge maps.

<sup>4</sup>Here we used the model adversarially trained at  $\text{eps}=8/255$  and test it against other perturbations; unlike the main text where we trained robust models separately for each epsilon.

```

# combined network
# LeNet Model definition
class MNIST_Net_combined(nn.Module):
    def __init__(self, net_type='gray'):
        super(MNIST_Net_combined, self).__init__()

        self.encoder = nn.Sequential( # like the Composition layer you built
            nn.Conv2d(1, 16, 3, stride=2, padding=1),
            nn.ReLU(),
            nn.Conv2d(16, 32, 3, stride=2, padding=1),
            nn.ReLU(),
            nn.Conv2d(32, 64, 7)
        )
        self.decoder = nn.Sequential(
            nn.ConvTranspose2d(64, 32, 7),
            nn.ReLU(),
            nn.ConvTranspose2d(32, 16, 3, stride=2, padding=1, output_padding=1),
            nn.ReLU(),
            nn.ConvTranspose2d(16, 1, 3, stride=2, padding=1, output_padding=1),
            nn.Sigmoid()
        )

        self.conv1 = nn.Conv2d(1, 10, kernel_size=5)
        self.conv2 = nn.Conv2d(10, 20, kernel_size=5)
        self.conv2_drop = nn.Dropout2d()
        self.fc1 = nn.Linear(320, 50)
        self.fc2 = nn.Linear(50, 10)

    def forward(self, x):
        z = self.encoder(x)
        x_auto = self.decoder(z) # reconstructed egde
        x_auto = x_auto.view(x_auto.shape[0],1, 28,28)
        x = F.relu(F.max_pool2d(self.conv1(x_auto), 2))
        x = F.relu(F.max_pool2d(self.conv2_drop(self.conv2(x)), 2))
        x = x.view(-1, 320)
        x = F.relu(self.fc1(x))
        x = F.dropout(x, training=self.training)
        x = self.fc2(x)
        return x, x_auto

```

Figure 9: PyTorch code of our pipeline shown in Fig 8.

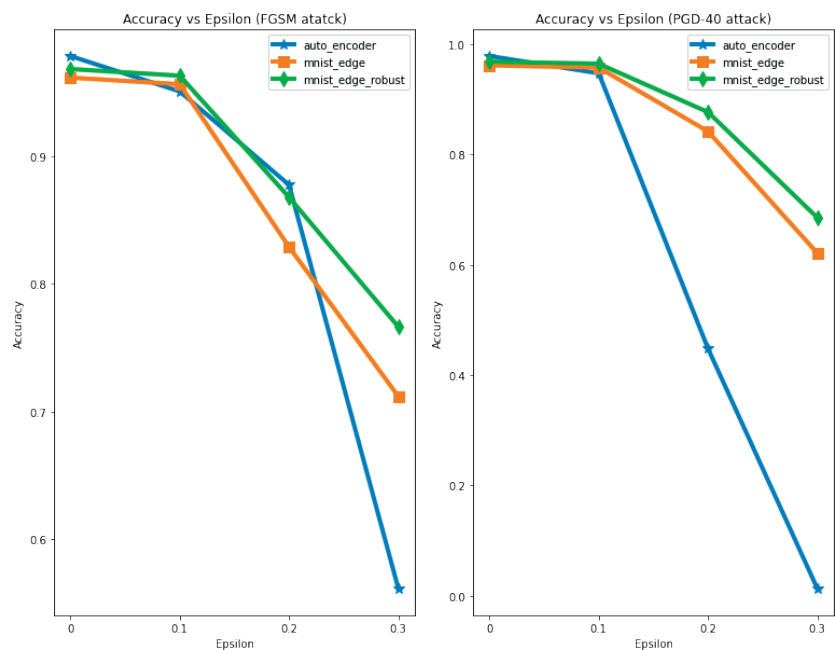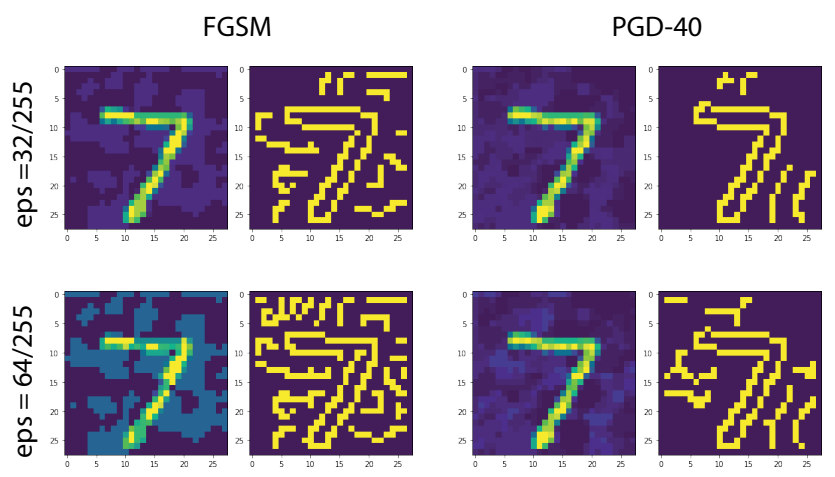

Figure 10: Top: Performance of the adaptive attack, Bottom: Samples adversarial images and their edge maps using the Canny edge detector.

## F Sample generated images by the conditional GAN in GAN-based Shape Defense (GSD)

### GSD: Regular training

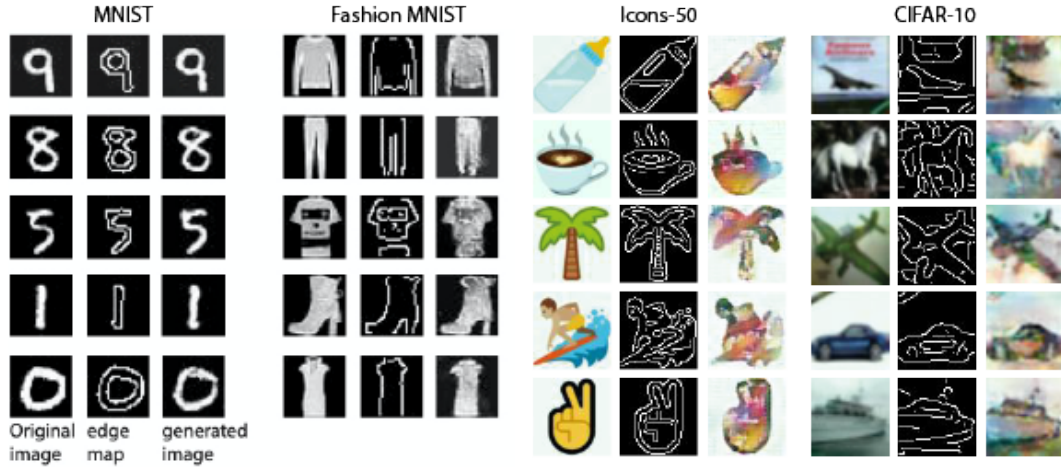

### GSD: Training over adversarial images

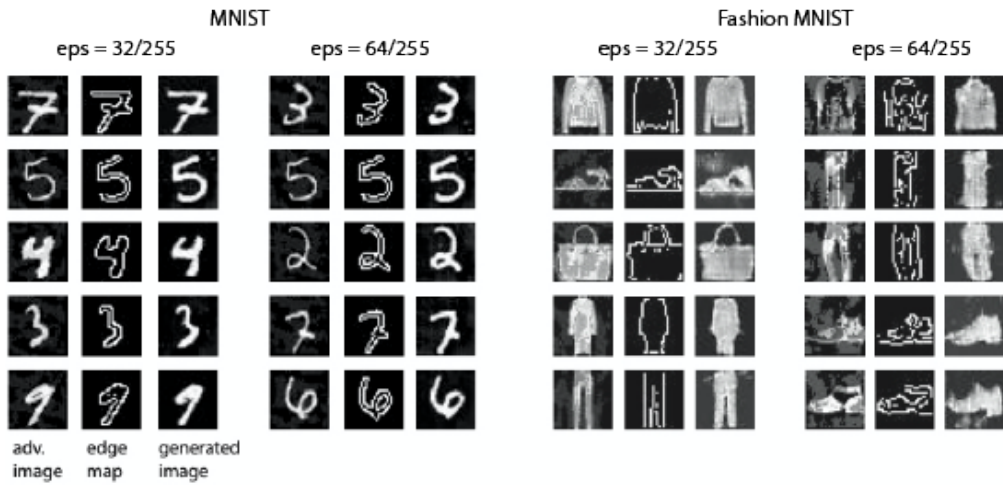

Figure 11: Top) GSD with a classifier trained on images generated (by pix2pix) only from the edge maps of the clean images, Bottom) GSD with edge maps derived from adversarial examples. Columns from left to right: adversarial images by the FGSM attack, their edge maps, and generated images by pix2pix.

## G Shape-based extensions of vanilla PGD adversarial training, free adversarial training (FreeAT), and fast adversarial training (FastAT) algorithms

---

**Algorithm 3** Shape-based PGD adversarial training for  $T$  epochs, given some radius  $\epsilon$ , adversarial step size  $\alpha$  and  $N$  PGD steps and a dataset of size  $M$  for a network  $f_\theta$ .  $\beta \in \{edge, img, imgedge\}$  indicates the net\_type and *redetect\_train* mean edge redetection during training.

---

```

for  $t = 1 \dots T$  do
  for  $i = 1 \dots M$  do
    // Perform PGD adversarial attack
     $\delta = 0$  // or randomly initialized
    for  $j = 1 \dots N$  do
       $\delta = \delta + \alpha \cdot \text{sign}(\nabla_\delta \ell(f_\theta(x_i + \delta), y_i))$ 
       $\delta = \max(\min(\delta, \epsilon), -\epsilon)$ 
    end for
     $\tilde{x}_i = x_i + \delta$ 
    if redetect_train &  $\beta == imgedge$  then
       $\tilde{x}_i = \text{detect\_edge}(\tilde{x}_i)$  // recompute and replace the edge map
    end if
     $\theta = \theta - \nabla_\theta \ell(f_\theta(\tilde{x}_i), y_i)$  // Update model weights with some optimizer, e.g. SGD
  end for
end for

```

---

**Algorithm 4** Shape-based “Free” adversarial training for  $T$  epochs, given some radius  $\epsilon$ ,  $N$  minibatch replays, and a dataset of size  $M$  for a network  $f_\theta$ .  $\beta \in \{edge, img, imgedge\}$  indicates the net\_type and *redetect\_train* mean edge redetection during training.

---

```

 $\delta = 0$ 
// Iterate  $T/N$  times to account for minibatch replays and run for  $T$  total epochs
for  $t = 1 \dots T/N$  do
  for  $i = 1 \dots M$  do
    // Perform simultaneous FGSM adversarial attack and model weight updates  $T$  times
    for  $j = 1 \dots N$  do
       $\tilde{x}_i = x_i + \delta$ 
      if redetect_train &  $\beta == imgedge$  then
         $\tilde{x}_i = \text{detect\_edge}(\tilde{x}_i)$  // recompute and replace the edge map
      end if
      // Compute gradients for perturbation and model weights simultaneously
       $\nabla_\delta, \nabla_\theta = \nabla \ell(f_\theta(\tilde{x}_i), y_i)$ 
       $\delta = \delta + \epsilon \cdot \text{sign}(\nabla_\delta)$ 
       $\delta = \max(\min(\delta, \epsilon), -\epsilon)$ 
       $\theta = \theta - \nabla_\theta$  // Update model weights with some optimizer, e.g. SGD
    end for
  end for
end for

```

---

---

**Algorithm 5** Shape-based FGSM adversarial training for  $T$  epochs, given some radius  $\epsilon$ ,  $N$  PGD steps, step size  $\alpha$ , and a dataset of size  $M$  for a network  $f_\theta$ .  $\beta \in \{edge, img, imgedge\}$  indicates the net\_type and *redetect\_train* mean edge redetection during training.

---

```

for  $t = 1 \dots T$  do
  for  $i = 1 \dots M$  do
    // Perform FGSM adversarial attack
     $\delta = \text{Uniform}(-\epsilon, \epsilon)$ 
     $\delta = \delta + \alpha \cdot \text{sign}(\nabla_\delta \ell(f_\theta(x_i + \delta), y_i))$ 
     $\delta = \max(\min(\delta, \epsilon), -\epsilon)$ 
     $\tilde{x}_i = x_i + \delta$ 
    if redetect_train &  $\beta == \text{imgedge}$  then
       $\tilde{x}_i = \text{detect\_edge}(\tilde{x}_i)$  // recompute and replace the edge map
    end if
     $\theta = \theta - \nabla_\theta \ell(f_\theta(\tilde{x}_i), y_i)$  // Update model weights with some optimizer, e.g. SGD
  end for
end for

```

---

Table 20: Performance of the Fast Adversarial Training (FastAT) method over three runs.

| Model             | Run 1 |        | Run 1 |        | Run 1 |        | Average      |              |
|-------------------|-------|--------|-------|--------|-------|--------|--------------|--------------|
|                   | Clean | PGD-10 | Clean | PGD-10 | Clean | PGD-10 | Clean        | PGD-10       |
| Edge              | 0.559 | 0.384  | 0.581 | 0.187  | 0.608 | 0.586  | 0.582        | 0.386        |
| RGB               | 0.813 | 0.368  | 0.598 | 0.205  | 0.889 | 0.569  | 0.767        | 0.381        |
| Img + Edge        | 0.863 | 0.590  | 0.882 | 0.334  | 0.878 | 0.878  | <b>0.874</b> | 0.386        |
| Redetect          | „     | 0.593  | „     | 0.341  | „     | 0.245  | „            | 0.393        |
| RGB + Redet. Edge | 0.892 | 0.001  | 0.817 | 0.115  | 0.889 | 0.105  | 0.866        | 0.074        |
| Redetect          | „     | 0.265  | „     | 0.656  | „     | 0.326  | „            | <b>0.416</b> |

Table 21: Performance of the Free Adversarial Training (FreeAT) method over three runs.

| Model             | Run 1 |        | Run 1 |        | Run 1 |        | Average      |              |
|-------------------|-------|--------|-------|--------|-------|--------|--------------|--------------|
|                   | Clean | PGD-10 | Clean | PGD-10 | Clean | PGD-10 | Clean        | PGD-10       |
| Edge              | 0.674 | 0.672  | 0.704 | 0.702  | 0.660 | 0.659  | 0.679        | <b>0.678</b> |
| RGB               | 0.783 | 0.450  | 0.768 | 0.450  | 0.772 | 0.447  | 0.774        | 0.449        |
| Img + Edge        | 0.784 | 0.432  | 0.779 | 0.447  | 0.782 | 0.448  | <b>0.782</b> | 0.442        |
| Redetect          | „     | 0.447  | „     | 0.448  | „     | 0.449  | „            | 0.448        |
| RGB + Redet. Edge | 0.776 | 0.451  | 0.776 | 0.454  | 0.780 | 0.447  | 0.777        | 0.451        |
| Redetect          | „     | 0.452  | „     | 0.456  | „     | 0.448  | „            | 0.452        |

## H Analysis of parameter $\alpha$ in Alg. 1 (EAT defense)

Table 22: Results (Top-1 acc.) over MNIST corresponding to  $\alpha = 0$  (i.e., adversarial training only on adversarial examples taking part in the loss function). See also Table 1 in the main text.

| $\epsilon$                   | Rob. model (8) |              | Rob. model (32) |              | Rob. model (64) |              | Average<br>Rob. models |
|------------------------------|----------------|--------------|-----------------|--------------|-----------------|--------------|------------------------|
|                              | 0/clean        | 8            | 0/clean         | 32           | 0/clean         | 64           |                        |
| <b>FGSM</b>                  |                |              |                 |              |                 |              |                        |
| <b>Img+Edge</b>              | <b>0.963</b>   | 0.938        | <b>0.959</b>    | 0.869        | 0.931           | 0.684        | 0.891                  |
| Redetect                     | "              | 0.943        | "               | 0.887        | "               | 0.727        | 0.902                  |
| <b>Img + Redetected Edge</b> | <b>0.963</b>   | 0.936        | 0.944           | 0.588        | <b>0.937</b>    | 0.030        | 0.733                  |
| Redetect                     | "              | <b>0.948</b> | "               | <b>0.911</b> | "               | <b>0.916</b> | <b>0.937</b>           |
| <b>PGD-40</b>                |                |              |                 |              |                 |              |                        |
| <b>Img+Edge</b>              | <b>0.966</b>   | 0.940        | <b>0.960</b>    | 0.859        | 0.928           | 0.607        | 0.877                  |
| Redetect                     | "              | <b>0.946</b> | "               | 0.883        | "               | 0.657        | 0.890                  |
| <b>Img + Redetected Edge</b> | 0.963          | 0.933        | 0.947           | 0.469        | <b>0.936</b>    | 0.000        | 0.708                  |
| Redetect                     | "              | <b>0.946</b> | "               | <b>0.913</b> | "               | <b>0.915</b> | <b>0.937</b>           |

Table 23: Results (Top-1 acc.) over Fashion MNIST corresponding to  $\alpha = 0$  (i.e., adversarial training only on adversarial examples taking part in the loss function). See also Table 3 in the main text.

| $\epsilon$                   | Rob. model (8) |              | Rob. model (32) |              | Rob. model (64) |              | Average<br>Rob. models |
|------------------------------|----------------|--------------|-----------------|--------------|-----------------|--------------|------------------------|
|                              | 0/clean        | 8            | 0/clean         | 32           | 0/clean         | 64           |                        |
| <b>FGSM</b>                  |                |              |                 |              |                 |              |                        |
| <b>Img+Edge</b>              | 0.756          | 0.701        | 0.732           | 0.619        | 0.683           | 0.487        | 0.663                  |
| Redetect                     | "              | 0.707        | "               | 0.635        | "               | 0.481        | 0.666                  |
| <b>Img + Redetected Edge</b> | <b>0.768</b>   | 0.705        | <b>0.739</b>    | 0.481        | <b>0.693</b>    | 0.040        | 0.571                  |
| Redetect                     | "              | <b>0.727</b> | "               | <b>0.660</b> | "               | <b>0.635</b> | <b>0.704</b>           |
| <b>PGD-40</b>                |                |              |                 |              |                 |              |                        |
| <b>Img+Edge</b>              | 0.768          | 0.702        | 0.749           | 0.573        | 0.718           | 0.432        | 0.657                  |
| Redetect                     | "              | 0.714        | "               | 0.593        | "               | 0.510        | 0.675                  |
| <b>Img + Redetected Edge</b> | <b>0.778</b>   | 0.702        | <b>0.762</b>    | 0.414        | <b>0.750</b>    | 0.001        | 0.568                  |
| Redetect                     | "              | <b>0.725</b> | "               | <b>0.632</b> | "               | <b>0.615</b> | <b>0.710</b>           |
